# Supplementary material
Source: PubMed Central journal article supplement (PMC7917019)

**Fig. 1d**

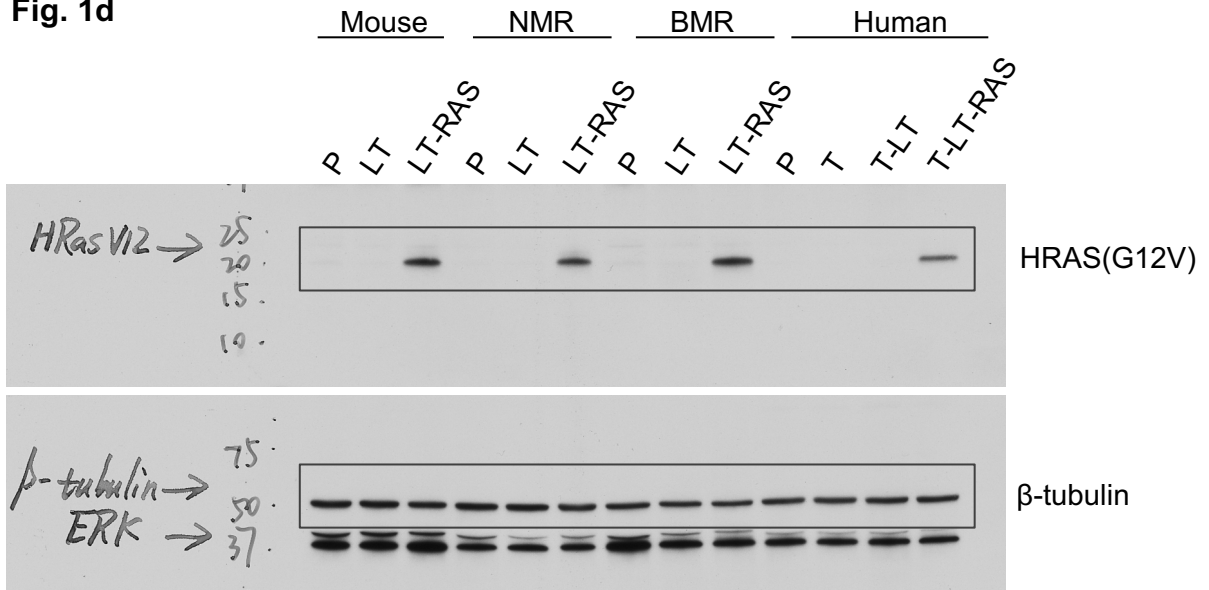

**Fig. 2a**

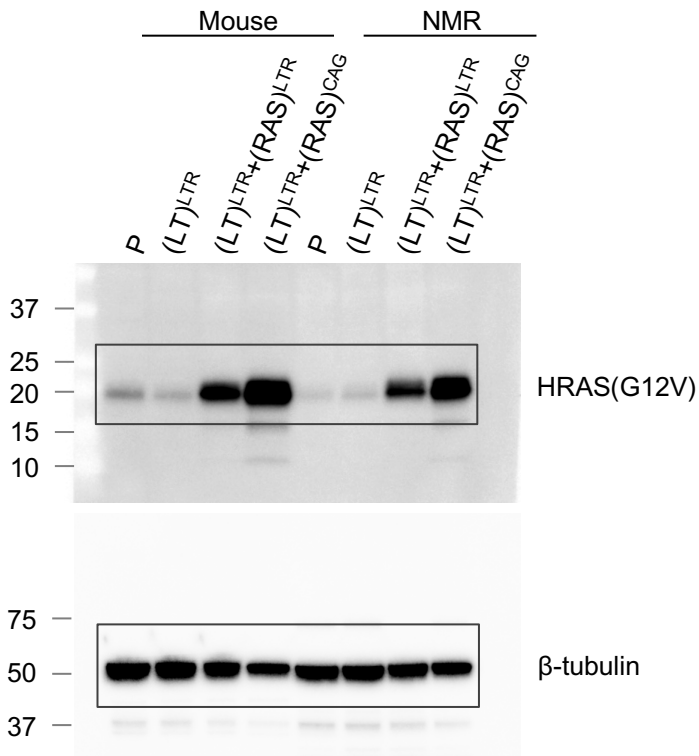

Supplement: NIHMS1659402-supplement-Supplemental_Figure_1.pdf [file NIHMS1659402-supplement-Supplemental_Figure_1.pdf]
